# Supplementary material for: Nonlinear relationship between glycated hemoglobin and cognitive impairment after acute mild ischemic stroke
Source: Research Square preprint supplement (doi:10.21203/rs.3.rs-1773791/v1), 2022-07-11
Supplement: Supplementary file 1 [file 855e3d9c841cb768497415a2.xls]

AGE	GENDER	BMI	EDUCATION	SMOKE	DRINK	BP	DM	LIPID	AF	HDL	LDL	TG	TC	FG	HBAC	HCY	CR	BUN	UA	CRP	MRS	MRSGROPE	INIHSS	MOCA	MOCAGRUP
81	1	23.73	4	1	2	1	2	2	2	1.23	2.05	0.548381759	4.089101479	4.83	5.9	26.8	92	10.1	378	0.499	1	0	0	27	1
71	1	22.68	4	3	1	2	2	2	2	1.13	2.99	1.516502305	6.805757475	4.1	6.1	14.9	68	4.75	378	0.6	3	1	3	26	1
88	1	21.88	4	1	2	1	2	2	2	1.12	2.13	5.532439473	7.124787483	4.8	6.6	24	126	10.41	377	22	2	0	1	26	1
55	1	30.1	4	1	2	1	1	2	2	1.23	2.4	1.636846816	1.976197002	5.34	5.2	15.9	78	2.61	367	0.499	2	0	2	26	1
86	1	21.89	3	1	2	1	2	2	2	1.352863562	2.99	1.345391257	4.963661118	7.19	6	10	102	6.76	363	48.91008178	2	0	3	26	1
63	1	21.88	3	2	1	1	1	2	2	1.14	2.62	0.054368246	5.48919992	9.63	7.4	12.6	85	5.89	362	2.05	1	0	2	27	1
74	1	21.26	2	1	2	1	2	2	2	1.17	2.46	5.298728295	1.680971472	4.29	6	9.7	117	6.18	361	0.499	1	0	0	26	1
81	1	26.29	4	3	2	2	2	2	2	1.32	1.63	0.734622531	5.348939727	4.22	6.1	17.6	67	5.42	360	0.499	2	0	2	26	1
66	1	22.03	3	2	1	1	1	2	2	1.538207917	2.21	1.34	4.26	5.47	7.8	8	96	5.46	357	0.86	2	0	1	26	1
64	1	27.56	5	1	2	1	2	2	2	1.18	4.54	3.254962178	4.242911672	6.77	8	13.6	6	6	356	1.73	2	0	1	27	1
57	1	22.77	3	1	2	2	2	2	2	1.08	1.93	0.540011706	6.883433073	4.42	5.2	10.6	68	3.63	354	3.67	2	0	1	26	1
52	1	20.24	4	3	1	1	2	2	2	1.567	2.32	1.488200062	5.432199603	3.91	5.8	21.5	100	6.96	352	21.5	3	1	2	26	1
61	1	23.03	4	2	1	1	2	2	2	1.44	2.2	0.943431495	4.42290791	4.16	5.5	20.5	98	5.8	347	0.7	2	0	2	26	1
66	1	23.88	3	1	2	1	2	2	2	1.35	2.54	1.029604684	1.038257115	5.13	5.9	13.1	94	6.33	344	0.4999	1	0	0	26	1
80	1	19.23	4	3	1	2	2	2	2	1.022340761	1.71	0.66	4.11	4.8	4.8	14.8	86	7.19	340	2.59	2	0	1	26	1
74	1	20.2	3	1	2	1	1	2	2	1.29	2.53	0.977936788	3.662630706	6.25	9.8	17.6	92	10.31	340	6.3	2	0	2	27	1
60	1	25.1	4	3	1	1	2	2	2	0.84	1.73	0.312341631	4.55628285	5.17	5	11.9	91	4.28	333	0.4	2	0	1	26	1
55	1	27.29	3	1	2	2	2	2	2	1.130008482	2.7	1.813247407	4.598758308	5.57	6.8	11.8	71	4.15	330	30.16024145	2	0	1	27	1
64	1	25.39	3	3	2	1	2	2	2	1.541891337	2.91	1.21	5.32	9.9	7.6	15.2	98	5.21	325	0.64	2	0	2	26	1
68	1	23.38	2	3	1	2	2	2	2	0.96	2.11	0.135760079	5.588110755	7.29	6.9	18.8	96	6.54	318	2.1	2	0	1	26	1
67	2	23.83	4	1	2	2	2	2	1	1.3	1.6	1.693011722	4.62650967	4.4	5.4	7.6	71	4.67	316	2	1	0	0	27	1
32	1	18.87	3	3	1	2	2	2	2	0.89	1.84	1.429226854	5.539836575	4.42	4.1	7.9	70	6.49	316	3.1	2	0	2	26	1
68	1	24.68	4	2	1	1	2	2	2	0.8	2.28	0.11504285	3.61499352	5.15	4.6	12	111	5.97	316	3.8	2	0	2	26	1
60	1	19.53	3	2	1	2	2	2	2	2.049677296	3.03	1.515377299	3.694337036	4.19	4.9	14.6	91	6.88	315	66.40992897	2	0	2	26	1
85	1	15.63	5	1	2	2	1	2	2	2.041730992	1.48	2.92	4.62	16.95	10.5	17.9	111	14.24	314	6.9	2	0	1	27	1
50	2	25.39	3	1	2	1	1	1	2	1.41	2.68	3.563218296	5.733349239	8.51	10.4	9.5	40	5.45	314	3.1	2	0	2	26	1
59	2	26.64	5	1	2	1	2	2	2	1.4	2.95	0.724935041	4.696353859	4.56	6	10.9	58	2.59	314	0.499	2	0	2	26	1
77	1	22.04	4	1	1	2	2	2	2	1.24	1.24	0.683151447	4.107386897	6.49	5.7	13	98	15.31	312	9	2	0	2	27	1
72	1	21.3	4	1	2	1	1	2	2	1.27	1.65	3.825871526	4.557737229	7.04	5.1	22.5	98	6.53	312	6.4	2	0	3	26	1
73	1	24.8	3	1	2	1	2	2	2	1.393832726	1.2	3.50231322	5.91764603	6.8	5.5	9.5	46	6.84	311	57.88129856	2	0	1	27	1
66	1	20.28	3	2	2	2	2	2	2	1.815214827	1.73	3.334116806	5.365787898	4.12	8	9.8	57	5.52	309	3.628871948	2	0	1	26	1
44	2	20.32	2	1	2	2	2	1	2	1.68	3.09	2.691500119	5.576108314	5.6	4.7	7.2	36	3.77	309	0.76	2	0	3	26	1
55	1	21.45	4	2	2	2	2	2	2	2.265695678	2.93	1.607199947	4.238095411	6.64	6.3	12	62	8.05	301	41.10087622	2	0	1	27	1
83	1	29.39	1	3	2	2	2	2	2	2	1.2	2.064078892	3.830398138	4.44	5.3	5	90	4.23	301	2	3	1	3	26	1
66	2	27.64	3	1	2	2	2	2	2	1.453033729	3.33	4.844743475	4.565619661	4.97	5.3	16.7	57	6.15	299	21.42487503	1	0	2	26	1
75	2	20	5	1	2	2	2	2	2	1.96	2.1	1.037464868	1.649815368	5.75	4.6	11.9	58	3.93	299	5.4	2	0	3	26	1
46	2	23.53	4	1	2	2	2	2	2	1.37	3.02	0.332651835	3.075449425	4.77	5.9	11	79	7.16	296	14.9	1	0	2	27	1
73	2	22.03	5	1	2	1	1	2	2	1.42	3.05	3.164384012	4.553357893	15.11	10.6	14.5	50	5.68	295	0.499	2	0	1	26	1
88	1	24.22	2	1	2	1	1	2	2	1.839677271	2.47	0.637485337	2.90232022	9.89	7.3	12	92	6.63	294	4.107514216	2	0	1	26	1
49	1	27.1	3	1	2	1	2	2	2	1.4	4.16	2.151084848	3.160554631	5.8	6	28.6	88	8.82	293	0.499	1	0	2	27	1
48	1	21.48	4	2	2	1	1	2	2	1.113004453	2.05	0.84	3.68	9.37	10.5	15	102	6.44	287	6.9	2	0	2	26	1
72	1	24.84	5	1	2	1	2	2	2	1.52	2.98	0.031276331	2.095690958	5.2	4.8	5.11	85	5.74	285	3.1	2	0	0	28	1
84	2	20.93	5	1	2	1	2	2	2	1.669655022	2.58	0.670948698	3.059283405	6.62	5.2	36.1	54	6.17	280	13.72857912	2	0	2	26	1
75	1	26.84	5	1	2	1	2	2	1	1.58	1.38	3.297680284	3.326423937	5.77	6.1	12.6	82	3.26	279	0.499	2	0	1	27	1
91	1	23.81	4	1	2	2	2	2	2	1.803961759	2.08	0.71	3.74	5.57	5.7	15.3	104	6.25	278	28.59	2	0	2	26	1
51	1	28.58	5	1	1	2	2	2	2	1.37	3.19	0.487662339	4.507307078	5.26	5	5	94	3.82	278	0.499	3	1	2	27	1
85	2	17.78	4	1	2	1	2	2	2	1.202971015	3.12	2.36	6.78	8.42	5.4	9.9	68	4.88	277	3.2	2	0	2	26	1
62	1	26.73	4	1	2	1	2	2	2	0.563395528	2.62	1.270685697	2.325246252	6.1	6.5	13	59	6.11	276	14.03935948	2	0	2	26	1
72	1	30.12	2	2	1	1	2	2	1	1.287402088	2.05	0.75	3.75	6.9	5.6	12.4	67	5.01	275	5.8	2	0	2	26	1
76	1	20.2	4	3	1	2	2	2	2	1	2.04	0.679874709	3.642531417	6.1	6	100	86	6.19	274	14.28	1	0	2	28	1
78	2	21.64	5	1	2	1	2	2	2	1.85	1.13	0.201249215	4.651275306	4.46	4.9	11.6	65	6.23	264	4.2	2	0	3	26	1
68	1	26.44	3	1	2	2	1	2	2	1.54	2.97	0.488995601	5.166987943	5.55	5.6	7.8	54	4.59	263	1.7	2	0	3	26	1
69	1	17.72	3	3	1	1	2	2	2	2.51	2.28	2.489498705	3.352732516	6.42	5	9.9	82	11.09	260	5	2	0	1	27	1
85	1	22.1	4	1	2	2	2	2	2	1.12	1.2	3.046245049	7.048062409	6.2	5.2	15.2	102	6.8	258	32	2	0	1	26	1
48	1	21.51	4	3	2	2	2	2	2	1.370915864	3.19	4.089884494	6.745821709	6.2	5.8	13	78	6.4	258	84.24258308	2	0	3	26	1
63	1	27.68	5	1	1	1	1	2	2	1.21	2.37	4.622827785	4.429797085	11.8	10.5	14.6	69	4.52	257	0.499	1	0	1	26	1
54	1	20.76	4	1	2	2	2	2	2	1.946217437	1.19	2.451036468	1.215339366	10.48	9.3	12	53	4.3	257	11.16550054	2	0	2	26	1
68	1	17.42	3	1	2	1	2	2	2	2.04	3.11	4.416790581	5.504857721	6.8	5.1	7.1	63	5.2	256	2.6	3	1	1	26	1
85	2	20	5	1	2	1	2	2	2	1.55	2.24	1.105414838	5.564773042	5.8	5	15.5	50	4.2	255	74.27	3	1	2	27	1
63	1	20.7	2	2	1	1	2	2	2	0.552886557	2.83	4.428052331	7.316596991	4.97	5.8	23.7	77	5.71	255	0.25604991	2	0	3	28	1
53	2	21.48	4	1	2	2	2	2	2	2.07	1.79	0.725415501	4.767163816	5.71	6.1	9.3	44	4.68	252	0.499	2	0	1	26	1
74	2	22.83	4	1	2	2	2	2	2	1.647897863	2.06	0.74	5.06	5.57	5.9	12.9	56	7	250	0.5	2	0	0	26	1
47	1	24.03	3	1	2	2	2	2	2	1.527563544	3.06	3.44	5.31	5	5	9.6	55	7	250	0.25	2	0	2	26	1
63	1	18.37	4	1	1	2	2	2	2	0.775839606	2	2	5	12	11.6	13	50	4	250	2	2	0	2	28	1
75	2	21.97	4	1	2	1	2	2	2	1.27	2.67	3.13197108	5.171243847	4.85	5.5	12.3	65	3.5	248	0.56	2	0	2	27	1
63	1	24.97	5	1	2	2	2	2	2	1.99	2.23	0.492394437	1.948240681	7.6	7.6	9.1	53	3.59	247	0.5	5	1	3	27	1
82	1	24.14	5	1	2	2	1	2	2	1.31	3.02	2.566026548	2.547235925	4.45	11	12.9	51	4.26	247	0.4999	2	0	3	26	1
53	1	19.53	3	1	2	2	2	2	2	2.282341186	3.2	6.092918248	6.711848944	5.4	4.1	13.6	69	7.1	246	3.046918089	2	0	3	26	1
48	1	24.09	2	2	2	1	2	2	2	1.37	3.08	0.150983298	2.858640171	5.6	7.5	12.5	62	5.73	244	10.2	2	0	1	27	1
67	2	22.72	4	1	2	1	1	2	2	1.38	4.74	1.99	7.26	13	11.2	11	64	6.77	244	5.4	2	0	2	26	1
72	2	22.6	4	1	2	1	2	2	2	1.8	3.79	1.105299318	2.165797224	5.46	5.5	15.9	70	5.73	243	0.5	2	0	1	26	1
72	1	21.8	4	1	2	1	2	2	2	1.38	3.78	0.399423022	4.664479511	6.3	6.3	15.2	65	6.3	238	10.2	1	0	1	27	1
76	1	18.37	2	1	2	1	2	2	2	1.702449317	6.2	1.061362295	3.267919943	5.76	6	12	84	8.6	234	12.64935709	2	0	3	26	1
67	1	19.97	4	1	2	1	2	2	2	1.91	3.81	1.274318708	1.327974724	9.57	7.2	11.9	80	3.14	231	23.72	2	0	3	28	1
47	1	23.88	2	1	2	2	2	2	2	1.337489169	2.31	0.945524781	2.818861364	4.28	5.6	40.7	87	8	230	8	1	0	0	26	1
81	1	23.44	4	2	1	1	2	2	2	1.56	1.18	3.744746753	2.814847598	4.66	6.4	23.2	84	6.16	228	71.84	5	1	1	26	1
77	2	20.57	2	1	2	1	1	2	2	1.516740201	1.84	6.634767467	4.75773941	11.67	7.1	9.4	53	5.28	228	16.81212915	2	0	3	26	1
50	2	24.78	5	1	2	2	2	2	2	1.45	2.98	3.934234694	5.515650934	5.62	5.7	9.2	49	5.43	226	0.499	2	0	1	26	1
74	2	21.48	5	1	2	2	2	2	2	1.54	2.49	0.046464542	3.598194233	4.67	4.9	11.4	64	11.38	226	0.79	2	0	2	28	1
73	2	20.13	4	1	2	1	1	2	2	1.012299666	2.35	2.27	4.77	8.94	8.2	11.3	58	4.72	225	6.1	2	0	2	26	1
86	2	22.19	5	1	2	1	2	2	2	0.643441937	3.34	0.92	5.84	5.35	5.2	14.4	59	4.8	223	20	2	0	0	26	1
49	2	25.39	5	1	2	1	2	2	2	1.12	2.69	1.74348483	2.890459639	4.22	5.6	13.6	60	3.56	220	0.499	2	0	1	28	1
96	2	22.22	5	1	2	2	1	2	1	1.47	3.05	5.50985352	5.388958564	4.39	6.2	14.8	81	5.72	219	0.5	1	0	0	26	1
65	2	27.01	4	1	2	1	2	2	2	0.756738063	3.23	0.48	5.98	6.09	6.4	12.1	54	4.8	218	0.58	2	0	0	26	1
75	2	23.01	5	3	2	1	2	2	2	1.2	4.37	1.341851548	3.996468209	6.3	6.1	20.6	53	5.45	216	2.8	2	0	2	26	1
70	2	21.93	4	1	2	1	2	2	2	1.6	3.28	1.170317618	5.010197214	4.4	5.6	10	72	5.7	215	0.3	2	0	0	28	1
76	2	26.27	5	1	2	2	2	2	2	1.79	2.73	1.920945591	5.330541156	4.9	7.3	9.1	63	5.98	214	1	2	0	1	27	1
66	1	22.86	4	1	2	1	1	2	2	0.757063156	2.07	0.328571317	5.326794714	8.35	10.1	15.9	71	4.95	211	33.91110138	5	1	2	26	1
52	2	21.5	3	1	2	2	2	2	2	1.444529342	2.03	1.819824467	5.699232265	4.78	8.4	7.6	45	7.7	209	6.951007755	2	0	2	27	1
66	1	26.14	3	1	2	1	2	2	2	1.44	3.17	3.803577964	4.985679402	4.71	5.9	15.1	66	3.94	208	1	2	0	1	28	1
54	2	22.04	3	1	2	1	1	2	2	1.400271356	4.52	4.000065364	7.263837636	14.5	10	12	64	9.18	207	73.12312225	2	0	2	26	1
56	1	18.07	4	1	2	2	2	2	2	0.95	2.03	2.552831876	6.074191546	6.4	6.6	10.26	68	5.2	207	9.6	2	0	2	26	1
79	2	22.22	5	1	2	2	1	2	2	1.61	2.07	2.39887796	5.314823459	14.05	14.7	12.9	53	7.07	207	4.3	2	0	3	26	1
82	2	18.37	4	3	2	2	2	2	2	0.792859147	1.33	3.319371704	4.74202279	6.3	7.2	12	62	3.91	203	17.34139417	2	0	0	26	1
67	1	21.34	4	3	1	2	2	2	2	1.12	1.07	3.909508294	4.797830242	5.8	7	25	87	6.02	201	35	2	0	1	26	1
61	1	20.28	3	1	2	2	2	2	2	2.07	2.5	2.775378838	4.041728439	4.63	5.7	10.5	75	5.8	201	1.2	2	0	2	26	1
57	1	26.56	5	2	1	2	2	2	2	1.16	2.7	1.743757263	5.576740216	8.33	4.9	8.4	30	4	200	0.5	2	0	2	28	1
82	1	22.77	4	1	2	1	2	2	2	2.08	1.82	1.97045077	1.793749305	5.97	5.8	16.2	63	3.5	198	0.61	2	0	3	26	1
71	2	20.17	5	1	2	1	2	2	2	1.204002002	2.13	0.53	4.48	4.9	5.1	14.5	48	4.4	189	4.3	3	1	3	26	1
81	1	20.83	3	1	2	1	2	2	2	1.04	1.98	1.459782321	3.28727809	5.8	5.6	24	49	2.87	187	26	2	0	1	28	1
51	1	25.39	3	2	1	2	1	2	2	1.34	3.6	2.172064545	1.84462363	7.71	6.6	6.8	83	7.17	185	0.499	1	0	0	26	1
62	1	22.99	5	1	1	1	1	2	2	1.443887926	5.6	4.038515033	5.842100138	13.5	13.42	16	32	13	184	43.46120879	2	0	3	26	1
65	1	23.44	1	2	1	2	1	2	2	1.34	3.48	0.580438119	4.323010872	9.85	6.5	11.8	67	8.9	178	2.38	2	0	2	28	1
80	2	21.08	5	1	2	1	2	2	2	1.54	2.04	1.486988448	3.824648505	6.05	6.2	14.9	75	4.76	176	10.19	3	1	2	28	1
77	1	19.53	4	1	2	2	1	2	2	1.28281523	1.98	0.72	4.09	7.93	9.2	13.1	78	6.29	176	6.5	2	0	2	26	1
79	1	21.97	4	2	2	2	2	2	2	1.86	2.53	1.563663093	3.955022715	6.2	4.5	16.7	66	2.48	172	1.2	2	0	2	26	1
63	2	27.7	4	1	2	1	2	2	2	1.56	3.09	1.837648088	4.399792754	3.67	4.8	13.9	72	5.06	172	0.499	2	0	3	26	1
69	2	20.28	4	1	2	1	2	2	2	1.45	3.3	2.494830858	5.090838344	4	5.9	9.6	49	5.84	171	0.15	2	0	1	28	1
43	2	21.03	4	1	2	2	2	2	2	1.08	1.53	1.618222466	4.432424302	4.53	4.7	9.6	48	4.25	171	0.54	3	1	2	27	1
81	2	20.03	5	1	2	2	2	2	2	1.713257626	1.29	1.458335137	4.982982817	20.66	12	12	51	4.55	165	54.54158861	2	0	3	26	1
73	2	25.64	5	1	2	1	2	2	2	1.33	3.01	2.732848295	5.100148464	5.1	5	14	74	6.03	164	0.499	3	1	1	28	1
48	1	26.93	3	1	1	2	2	2	2	1.477499038	1.15	1	2	5	5.5	14.9	52	3	158	0.23	2	0	1	27	1
76	2	22.03	4	1	2	1	2	2	2	1.886487292	1.06	0.69	3.04	7.13	5	10	47	2.89	157	1.02	2	0	0	26	1
71	1	22.99	4	2	2	2	2	2	2	1.28	2.24	1.213035812	4.884035842	6.8	7.9	12.4	91	6.97	150	NA	2	0	2	27	1
83	1	21.48	5	1	2	1	2	2	2	1.420073767	1.42	5.26	3.41	5.28	5.7	13.8	102	3.75	146	5.2	2	0	3	26	1
52	2	27.34	5	1	2	2	2	1	2	1.39	3.97	2.695068456	3.880965761	6.39	5.8	5	50	4.68	139	0.499	3	1	3	27	1
86	2	20.81	5	1	2	2	2	2	1	1.76019431	1.99	0.79	4.5	4.82	5.2	15	107	6.35	102	5.8	2	0	1	27	1
89	1	21.88	1	2	2	2	2	2	2	1.53	3.16	1.228487667	4.233123728	4.1	5.4	18.1	82	8.9	82	0.499	2	0	2	26	1
66	2	26.14	3	1	2	2	2	2	2	1.03	2.77	1.378766423	4.244390849	6.8	6.5	6.2	66	6.43	66	12	2	0	2	26	1
60	2	23.44	3	1	2	2	2	2	2	0.994423616	3.25	1.253997474	2.970861465	6.43	5.6	14.7	54	5.44	54	3	1	0	0	28	1
70	2	27.34	4	1	2	1	2	2	2	1.598894018	2.16	1.466995021	5.121667372	4.68	5	25.9	143	17.55	1047	60.06801521	2	0	0	23	0
81	2	20.08	4	1	2	2	2	2	2	1.67	2.12	1.370959376	4.171696303	3.94	5.9	17.3	120	8.07	743	4.3	2	0	3	20	0
52	1	22.86	2	1	2	2	2	2	2	0.81	3.04	0.643946948	3.185594615	6.1	5.9	11.2	75	2.65	703	0.499	2	0	1	23	0
62	2	24.31	5	1	2	2	2	2	2	1.018025453	2.37	4.393590309	5.162805689	4.35	6.3	14.6	84	10.8	609	39.00569524	2	0	1	19	0
57	1	28.03	1	1	2	1	2	2	2	1.3	4.28	0.433158485	5.499665055	5.28	7.9	6	93	7.29	607	2	2	0	1	18	0
57	1	21.97	3	1	2	1	2	2	2	1.04	3.15	0.268808644	3.711500566	5.6	5.2	38.7	122	7.05	585	22	2	0	1	25	0
71	1	29.79	1	1	2	1	2	2	2	1.411165449	2.21	0.93	3.41	5.18	6.5	14.6	97	5.9	576	27.48	2	0	2	23	0
65	1	22.84	4	1	2	1	2	2	2	1.43	2.77	1.62645366	4.220950309	8.62	6.1	19.5	70	4.46	568	0.58	3	1	2	21	0
67	1	23.03	5	1	2	2	2	2	2	0.91	2.14	0.447564833	4.667413027	5.07	5.6	15.6	151	9.28	556	4.78	3	1	3	23	0
56	1	22.86	4	2	1	1	2	2	2	1.36	3.83	2.452272172	5.888159738	4.46	5.6	20.7	142	10.6	552	4.17	2	0	1	25	0
48	1	27.25	3	3	1	1	2	2	2	1.318201653	1.5	0.061429446	3.700510179	5.09	5.2	16.6	119	5.75	543	29.03938074	2	0	2	20	0
65	2	23.83	5	1	2	1	1	2	2	1.537973124	3.21	4.22	5.89	6.09	5.9	25.2	91	9.43	535	4.6	2	0	2	23	0
70	2	27.11	3	1	2	2	2	2	2	1.95	3.89	1.057104611	3.639810311	6.07	5.8	16.7	110	8.2	513	0.5	2	0	2	25	0
71	1	22.04	5	1	2	1	2	2	2	1.07346217	2.45	0.178080336	5.393090698	5.96	6	16.4	62	4.94	512	1.959825879	2	0	2	25	0
76	1	21.97	4	2	2	2	2	2	2	1.64	3.02	0.667225885	4.756332082	5.52	5.7	14.8	97	6	511	6.26	2	0	0	23	0
67	2	29.24	5	1	2	1	2	2	2	1.24	1.48	0.253237197	3.456044258	6.11	5.8	10.7	51	5.08	504	NA	2	0	1	24	0
71	2	23.31	5	1	2	1	1	1	2	1.42	0.78	0.61882862	4.302659881	5.68	11.5	14.6	89	7.95	504	2	2	0	2	23	0
72	2	19.22	5	1	2	2	2	2	2	1.7	1.31	2.401449302	6.167584416	4.2	6.3	9.9	86	7.07	497	0.499	2	0	0	25	0
75	2	27.53	5	1	2	1	1	1	2	2.5	1.5	1.692857002	2.967804783	7.8	5.6	17	78	14	489	16	4	1	3	21	0
63	1	23.03	3	1	2	1	2	2	2	1.36	2.63	3.197648136	2.211848269	5.11	5.8	17	140	4.2	489	0.499	2	0	3	22	0
71	1	21.61	4	1	2	1	2	2	2	1.933617534	1.89	1.816514338	3.955816861	3.8	5.7	18.1	73	5	488	10.63785802	2	0	0	25	0
71	1	20.76	4	1	2	2	2	2	2	0.770384343	1.81	4.879431568	5.424432492	5.01	8	12	95	6.64	488	19.84798782	2	0	2	21	0
71	1	17.09	4	1	1	1	2	2	2	1.439550785	1.7	1.579095021	2.252922638	5.4	4.9	12.7	98	8.37	479	17.58849589	2	0	2	22	0
71	1	16.14	4	1	2	2	2	2	2	1.06	2.24	2.150393224	5.984082712	4.83	6.4	14.8	114	6.7	475	12	2	0	3	25	0
41	1	29.07	4	3	1	1	2	2	2	1.825615375	1.96	4.144020947	5.810130767	4.09	6	22.5	173	7.12	470	15.86829187	3	1	3	25	0
75	1	26.85	5	1	2	1	2	2	2	1.21	2.15	3.268460123	3.722715828	4.91	5.4	23.3	101	7.33	468	0.4	2	0	1	23	0
81	1	25.08	5	2	1	1	2	2	2	2.21	3.42	0.076147815	2.668312197	6.5	6.4	18.7	86	11.24	465	1.1	2	0	2	22	0
75	2	23.44	5	1	2	1	1	2	2	1.35	3.03	2.859005342	3.600728504	8.46	7.6	14.3	71	7.07	464	29.28	2	0	1	25	0
72	1	21.48	4	1	2	2	1	2	2	1.55	2.7	4.743028756	5.892959041	8.82	12	24	156	19.72	464	6.9	2	0	2	21	0
50	1	20.55	3	1	2	2	2	2	2	1.21	2.1	4.418306087	6.280414503	4.63	5.8	11.8	72	3.88	464	0.54	1	0	2	25	0
80	1	21.83	5	1	2	1	2	2	2	0.94	2.95	5.939479534	6.662373362	9.06	6.4	13	127	11.59	463	0.499	2	0	0	23	0
80	1	22.04	5	2	1	1	1	2	2	1.582229126	3.02	2.328483821	3.262021164	8.56	7.1	12.3	51	7.9	460	68.47747975	2	0	1	23	0
53	1	30.84	4	3	1	1	2	2	2	1.335162871	2.49	2.39	4.56	5.63	4.5	7.2	101	4.27	456	2.8	2	0	1	20	0
56	1	24.49	4	3	1	1	1	2	2	1.33	3.76	3.6077512	6.728665603	22.33	6.4	15.8	374	11.94	455	3.62	2	0	2	19	0
76	2	22.22	5	1	2	1	2	2	2	1.247590067	2.83	4.56	5.94	7.34	5.4	14.6	59	7.5	453	6.5	2	0	3	23	0
62	2	22.22	5	1	2	1	2	2	2	1.18	2.51	1.391658588	3.095978907	5.15	7.1	10.7	50	7.2	450	5.8	2	0	3	19	0
86	1	21.26	4	3	2	2	2	2	2	1.543261346	1.64	4.28989357	4.028256697	4.83	8	13.6	81	5.47	447	57.40668728	2	0	2	25	0
81	1	23.78	4	2	2	2	2	2	2	0.95	2.11	2.440869393	5.155036869	6.2	5.6	12.3	92	10.18	445	2.1	2	0	3	21	0
84	2	26.35	1	1	2	1	1	1	2	2.36074724	3.09	4.190633953	3.718380501	8.07	12	15	85	10.96	442	15.65656169	3	1	3	22	0
48	1	28.13	3	1	2	2	2	2	2	1.17	3.16	0.774373427	2.519750494	5.88	4.2	7.3	93	3.4	442	0.6	2	0	3	21	0
70	1	20.76	4	1	1	1	1	2	2	1.16	2.13	2.154845269	5.291360863	8.1	7.2	8.7	112	7.08	440	0.499	2	0	2	25	0
48	1	25.39	4	3	1	1	1	2	2	1.647035858	0.51	0.181774322	4.999374848	5.43	6.8	10.4	71	5.08	437	57.22336391	2	0	1	22	0
73	1	24.77	4	2	2	1	2	2	2	1.72	1.69	0.939419777	3.386707305	5.83	5.8	10.7	83	7.2	436	0.6	3	1	2	25	0
57	1	19.98	4	2	2	1	2	2	2	1.18	3.12	0.149481836	3.643488748	5.8	6	10.9	62	7.16	436	4.9	2	0	2	21	0
81	1	22.77	4	1	2	1	2	2	2	1.58	3.64	0.475440738	4.753871974	5	6.6	13.2	77	6.28	434	35	2	0	1	21	0
64	1	22.95	1	2	2	1	1	2	2	1.18	1.95	0.208716135	3.695650695	4.37	5.6	11.2	84	5.48	434	0.83	2	0	3	22	0
47	1	24.98	3	3	1	2	2	2	2	1.181435723	2.21	1.405856973	3.09389377	5.25	5.5	18.1	61	6.48	432	18.8107642	2	0	0	19	0
54	1	27.1	4	3	1	1	2	2	2	1.504602511	1.38	2.954591064	5.813128067	6.7	5.3	16.1	83	7.1	432	67.58785097	1	0	1	23	0
69	1	19.1	3	3	1	2	2	2	2	2.08	2.15	0.847889836	2.987370784	4.3	5	11.4	95	4.11	425	4	2	0	1	23	0
87	1	21.26	4	2	1	1	2	2	2	1.68	2.41	1.011594967	4.669985761	6.82	5.3	13	68	5.84	424	0.5	2	0	1	21	0
81	1	24.46	4	2	1	1	2	2	2	0.94	0.74	1.052445677	5.846787325	4.32	4.6	9.5	102	6.62	424	3.47	2	0	2	22	0
53	1	25.71	4	1	2	1	1	2	2	0.71	2.41	1.951873916	4.837385469	9.69	11.4	5	85	7.72	422	5	2	0	1	22	0
55	1	20.55	3	1	2	1	2	2	2	1.459046073	3.49	3.841969161	3.309802429	5.8	6.5	12	72	6.18	421	0.035949519	2	0	3	21	0
83	2	22.22	5	1	2	1	2	2	2	1.405317369	3.18	2.53	5.59	4.39	4.6	18.1	74	5.01	421	6.3	2	0	3	25	0
61	1	28.04	4	3	1	1	2	2	2	1.578357144	1.34	2.091196515	3.471884569	5.1	5.5	11	89	4.74	419	6.434362577	2	0	1	23	0
72	1	23.31	4	1	2	2	1	2	2	1.651127326	1.29	1.191752663	4.07729065	6.52	7.4	15.8	72	8.66	417	85.68755593	2	0	1	21	0
71	2	22.6	3	1	2	1	2	2	2	0.99	2.64	0.356505642	4.709191723	6.4	5.6	15.2	86	6.28	417	2	2	0	2	24	0
69	2	22.03	4	1	2	1	2	2	2	1.248463505	2.42	1.957809141	6.12744219	3.55	5.5	16.3	65	11.14	414	44.81836149	2	0	1	23	0
60	2	20.83	4	1	2	1	2	2	2	1.58	2.45	1.376618695	3.520809841	3.41	5.4	2.7	88	10.89	412	0.8	1	0	0	21	0
79	1	20.96	1	1	2	1	2	2	2	1.190186279	2.49	1.978565038	3.35551658	8.55	9.8	20.8	76	3.88	410	22.58324103	3	1	2	25	0
74	1	20.9	4	2	2	2	2	2	2	1.890350797	4.46	1.08	3.220338748	4.47	4.7	18.8	119	5.39	407	11	1	0	0	24	0
61	1	20.57	4	1	2	2	2	2	2	1.68	3.29	0.835561494	2.536518803	5.2	5.6	13.9	68	3.6	405	36	2	0	1	19	0
83	1	26.29	2	3	1	1	2	2	2	1.32	2.36	1.758467167	3.575899378	5.01	5.4	22.8	92	8.02	405	0.499	2	0	1	24	0
87	1	22.86	5	1	1	2	2	2	2	1.563730768	1.92	2.800276089	6.422391862	4.77	7.2	15.7	76	5.27	403	28.44198924	2	0	2	22	0
51	1	22.03	5	2	1	1	1	2	2	1.238078468	4.24	4.366324585	5.575507219	9.85	8	23.1	231	13.72	400	38.84247029	5	1	2	25	0
64	1	21.01	5	3	2	1	2	2	2	1.154487707	2.35	6.217848414	7.366774967	5.67	4.9	15.2	76	7.55	399	72.18859713	1	0	1	25	0
55	1	21.94	4	3	1	2	2	2	2	1.689284805	1.47	4.741212644	6.062937406	4.12	4.3	23.4	59	6.16	399	29.40442004	2	0	2	23	0
23	2	19.14	1	1	2	2	2	2	2	1.276530773	3.24	5.08223461	5.689977935	4.26	5	12	50	3.44	398	49.06789134	2	0	0	25	0
70	1	24.84	5	1	1	2	2	2	2	1.53	3.17	0.709579755	4.452453659	4.9	5.4	6.81	94	6.57	398	0.21	2	0	2	23	0
68	1	23.44	3	2	1	1	2	2	2	1.29	3.38	1.947506435	4.474602242	5.32	5.3	11.7	76	7.5	398	4.9	2	0	3	21	0
66	1	24.03	3	3	1	1	1	2	2	1.41215667	1.66	3.31	3.44	12.05	6.5	16.2	116	5.12	397	0.87	2	0	1	23	0
75	1	21.88	5	2	1	1	2	2	2	0.507511905	4.12	1.62	6.8	6.77	6.3	14.7	94	6.63	396	0.53	2	0	2	21	0
62	2	24.14	4	1	2	1	2	2	2	1.32	3.31	2.33171894	1.025340515	5.84	6.6	12	80	8.61	395	0.499	2	0	3	24	0
72	1	25.47	4	1	2	2	2	2	2	1.21	2.23	1.265033892	3.866487128	4.65	5.8	16.9	70	4.76	395	0.56	2	0	3	24	0
82	1	19.84	4	1	2	1	2	2	2	1.09	2.12	2.871210523	4.595624383	4.05	6.1	17.4	66	3.91	394	0.499	2	0	2	21	0
65	1	18.37	4	1	2	2	2	2	2	1.55	1.67	2.592069342	4.697928584	4.86	5.4	17.7	101	9.25	394	0.4	2	0	3	25	0
49	2	26.67	4	1	2	1	2	2	2	1.836143449	2.94	1.65	4.39	5.14	5.2	10.3	43	5.03	393	0.34	2	0	2	23	0
70	1	24.46	5	2	1	1	2	2	2	3.849604321	4.16	2.34	7.37	6.02	5.12	12	88	5.75	393	704	2	0	3	22	0
80	1	21.97	3	3	1	2	2	2	2	1.44	2.72	3.063357436	3.749320217	4.21	5.6	25.7	99	5.69	391	2.27	1	0	0	25	0
81	1	24.78	4	1	2	1	2	2	2	1.450028298	2.4	4.429563318	3.503537906	4.86	5.8	12.9	90	7.79	391	15.91219235	2	0	3	23	0
72	2	27.77	5	1	2	1	2	2	2	1.12	1.66	3.903185356	6.892792137	4.78	5.5	13.7	78	7.51	388	10.19	2	0	1	21	0
34	1	27.68	2	3	1	1	2	2	2	0.973447233	2.4	3.46	4.35	4.47	4.4	18.9	113	4.46	388	5.1	2	0	3	25	0
64	2	26.64	4	1	2	2	1	2	2	1.37	3.13	0.117654786	3.797254705	6.35	7.6	11.5	46	5.02	386	0.4	1	0	1	19	0
52	1	24.45	4	3	1	1	2	2	2	2.188591727	2.58	1.801873501	2.40705246	6.69	6	31.5	70	6.95	380	20.94878777	2	0	3	25	0
61	1	19.84	4	3	1	2	2	2	2	0.858933223	2.21	3.101165118	5.370600943	4.9	4.8	14.3	79	4.31	379	21.91823022	2	0	0	22	0
66	1	24.46	4	1	2	1	2	2	2	1.25	2.48	1.540445489	3.696989782	4.57	5.4	11	71	8.16	377	5.7	2	0	3	20	0
73	1	21.26	4	1	2	1	2	2	2	1.73	2.64	0.818373493	2.976189212	4.22	5.1	14.5	85	6.93	373	0.499	2	0	2	25	0
73	1	19.1	4	2	2	1	2	2	2	1.85	2.89	0.03627728	4.570539218	4.61	5.6	17.9	65	3.61	372	0.4	2	0	2	23	0
74	2	21.48	4	1	2	2	2	2	2	1.74	2.59	1.861250135	5.655054847	4.83	6.4	18	92	5.63	372	4.8	2	0	3	21	0
74	1	22.96	5	3	1	2	2	2	2	1.354804611	2.7	0.989381026	3.533915899	5.35	4.9	2.7	89	5.82	370	42.97205633	2	0	1	25	0
56	1	23.88	5	1	2	2	2	2	2	1.74	4.33	1.698110405	2.727287716	5.06	5.8	14.5	89	5.72	368	0.57	2	0	0	24	0
65	2	24.97	4	1	2	2	2	2	2	0.651700855	3.97	1.89	6.55	5.52	4.9	11	57	5.12	368	0.77	3	1	0	19	0
77	2	20	5	1	2	1	2	2	2	1.77	2.91	0.086496378	2.492604165	7.59	5.6	11.5	74	11.2	365	2.36	2	0	3	24	0
79	1	25.51	4	1	2	1	2	2	2	1.47	2.14	4.731577801	4.64	7.32	4.7	10.6	109	7.25	363	3.2	2	0	1	23	0
74	2	22.43	5	1	2	1	2	2	2	1.19	2.12	1.936056864	3.243628296	5.71	7	14.4	73	6.47	363	5.4	3	1	3	21	0
66	1	22.49	4	2	1	1	2	2	2	1.257481241	2.06	0.86	4.3	5.97	6.4	13.5	79	7.69	362	7.1	1	0	3	24	0
94	1	18.59	5	1	2	2	2	2	2	1.567569115	2.21	0.92	3.94	5.13	6	13	106	10.66	359	5	3	1	2	23	0
83	2	22.31	4	1	2	1	1	1	2	1.2	1.78	1.940783601	2.522437255	11.9	8.9	23	57	5	358	11	1	0	2	25	0
72	1	26.67	5	3	1	1	1	2	2	1.384755177	1.12	1.94	2.84	5.59	7	15.2	80	2.79	357	7.3	2	0	3	20	0
53	1	23.44	4	1	2	1	2	2	2	1.725520668	2.09	3.947474061	5.162395697	3.39	7	12	98	5.76	356	4.280017589	2	0	1	25	0
68	2	26.04	4	1	2	2	2	2	2	1.3	3.26	1.337412121	1.536609871	5.64	5.6	10.9	62	8.2	356	0.599	2	0	2	25	0
68	1	21.83	4	3	1	2	2	2	2	1.24	2.76	1.447795931	3.337400547	4.66	5.8	13	84	5.67	354	4.3	3	1	3	25	0
75	2	19.72	5	1	2	1	2	2	2	1.505873014	2.31	5.773153829	4.500208424	5.05	5.9	12.4	61	4.04	353	0.56	2	0	0	21	0
75	2	24.97	4	1	2	1	2	2	2	1.23	3.46	0.033920931	3.363568036	11.53	10.3	3.1	58	7.81	353	0.54	2	0	3	25	0
77	1	20.93	5	1	2	1	2	2	2	1.135339436	2.33	0.5	4.57	5.6	6	10.2	56	4	351	0.45	2	0	2	24	0
37	1	28.31	2	2	1	1	2	1	2	1.82	3.59	0.134309487	6.818416206	6.13	4.3	10.3	86	5.78	351	2.1	2	0	3	25	0
43	1	25.39	3	3	2	2	2	2	2	0.94	2.7	0.380513308	4.73373159	3.79	5.7	11.1	106	6.12	349	0.499	2	0	1	23	0
71	1	20.8	5	1	2	1	2	2	2	1.59	3.33	4.740000474	5.357998485	5.4	4.21	10.8	61	6.05	349	0.67	2	0	3	20	0
79	1	22.04	3	2	2	1	1	2	2	1.42	3.15	3.567334993	6.100623977	10.88	10.4	16.7	64	3.67	348	0.4	1	0	1	23	0
76	1	25.71	4	2	2	2	2	2	2	1.24	0.65	0.967468994	2.489034921	10.08	6.6	14	56	12	345	0.499	2	0	0	25	0
43	2	26.14	4	1	2	2	2	2	2	2.14	2.75	2.451236827	4.218372525	10.95	9.8	11.3	35	2.57	343	1.45	2	0	2	24	0
65	1	27.85	4	1	2	1	2	2	2	1.282938486	2.61	2.659934117	5.406192468	5.62	6.4	12.3	84	5.21	343	21.67186408	2	0	2	24	0
80	2	19.61	5	1	2	1	2	2	2	1.42	2.76	4.150790668	0.894901616	12.9	4.6	8.1	62	5.83	339	2.1	2	0	3	23	0
78	2	23.53	5	1	2	2	1	2	2	2.05	4.68	1.718846178	4.768720056	4.8	6.9	13.1	118	8.12	338	3.47	2	0	2	23	0
82	2	19.53	3	1	2	1	2	2	2	2.182166119	1.75	0.824645945	3.543184687	5	8.2	9.8	71	8.26	337	20.80198493	2	0	3	21	0
75	1	25.95	4	1	2	1	1	2	2	1.751731807	1.91	1.13	3.98	6.52	7.6	10.6	62	6.31	336	0.5	1	0	0	24	0
63	1	24.61	4	3	1	2	2	2	2	1.31	4.12	3.336850876	7.172838034	6.5	5.6	18.7	107	7.85	336	0.499	2	0	1	23	0
74	1	22.64	3	1	2	1	2	2	2	1.52873834	2.86	0.75	5.66	5.01	4.9	10	88	6.04	336	0.68	2	0	2	25	0
68	2	23.03	3	1	2	1	2	2	2	1.398198917	2.44	0.816173804	5.69661662	20.14	12	12.5	47	4.74	334	58.10507091	2	0	1	24	0
76	1	22.15	4	1	2	2	2	2	2	2.13463114	1.2	1.032564015	3.683524696	7.61	6.7	12	91	14.76	331	10.85807729	2	0	3	20	0
73	2	24.84	5	1	2	1	2	2	2	1.76	2.4	1.905742679	3.301769692	5.07	5.8	19.9	64	9.9	326	0.499	1	0	1	25	0
53	2	24.65	5	1	2	1	2	2	2	1.31	2.57	1.530589543	4.566792711	3.69	4.7	8.4	99	8.17	326	5.6	2	0	2	22	0
75	1	24.98	4	1	1	1	2	2	2	1.36	2.08	0.301854838	2.928240796	7.18	6.6	14.2	81	4.02	326	4	3	1	3	24	0
75	1	22.04	3	3	1	1	2	2	2	1.78	2.91	1.025719007	0.87788452	6.02	5	19.2	100	4.67	325	4.8	2	0	1	20	0
63	2	20.81	4	1	2	2	2	2	2	0.786020832	6.16	3.93	9.5	5.13	5.1	12.9	55	6.46	325	4.6	2	0	3	25	0
63	2	24.14	4	1	2	2	2	2	2	0.768338277	3.34	5.254885783	6.772089126	5.09	5.6	21.3	58	4.62	325	13.76313624	3	1	3	25	0
81	2	22.22	5	1	2	1	2	1	2	1.74	3.36	7.609397471	4.806743406	3.6	5.9	27.9	55	5.18	324	0.78	1	0	2	25	0
53	1	25.71	4	1	2	1	2	2	2	1.37	2.99	1.425901297	3.44073837	4.4	5.9	14.9	99	5.73	324	0.5	2	0	3	25	0
56	1	24.61	3	3	2	1	1	1	2	1.35	1.81	4.745588014	7.275684657	6.85	7	13.9	82	5.65	320	0.499	2	0	3	23	0
74	1	23.23	3	2	2	2	2	2	2	0.95	1.51	0.185206635	5.065020036	4.45	5.6	17.6	82	5.8	318	0.4	3	1	2	25	0
63	1	24.09	5	3	1	2	2	2	2	1.57	3.74	0.784503065	4.437939334	6.63	5.5	16.7	79	5	315	0.499	1	0	0	23	0
68	2	24.84	5	1	2	2	2	2	2	1.8	2.49	3.01065255	3.320228867	4.59	5.7	14.1	60	3.16	315	0.499	2	0	2	22	0
74	1	23.81	2	3	2	1	2	2	2	1.26	2.45	2.036706186	8.134855207	5.83	6.1	13.2	80	5.42	314	0.499	1	0	2	24	0
52	1	33.33	3	3	1	1	1	2	2	0.98	0.97	1.790720986	3.524828717	11.86	8.2	10.1	61	3.93	313	0.56	2	0	1	25	0
53	1	22.1	3	3	2	2	2	2	2	1.22	2.53	3.35193883	3.215934185	4.71	6.1	10.2	79	4.63	313	0.86	2	0	2	22	0
70	1	20.64	5	1	1	1	2	2	2	1.58	2.9	1.090153761	6.428387994	5.22	5.2	17.9	79	5.9	312	1.1	2	0	0	25	0
61	1	20.31	4	1	2	2	2	2	2	1.51	2.15	2.623737785	4.047716282	3.78	5.5	19	87	5.42	312	0.49	1	0	0	20	0
72	1	22.99	2	1	2	2	2	2	1	1.48	2.97	0.177330008	4.590770334	6.2	6.8	8.9	76	5.48	312	13	1	0	2	23	0
74	1	24.34	3	1	2	1	2	2	2	1.139838258	2.1	6.99450498	5.340983418	6.99	7.7	17.7	114	4.76	311	0.701462416	2	0	1	25	0
75	1	20.03	5	1	2	1	2	2	2	1.397567438	2.01	0.75	4.21	4.22	5.3	29.6	124	8.62	311	0.67	3	1	3	25	0
66	1	17.72	3	1	2	2	1	2	2	1.306709553	5.54	5.064884235	4.570305295	11.21	8	12	182	7.82	310	27.79532613	2	0	1	22	0
63	2	20.03	5	1	2	1	2	2	2	1.15	2.46	1.555025361	4.393920387	4.24	5	13.7	74	5.98	310	8.1	2	0	2	25	0
67	2	22.03	3	1	2	2	2	2	2	1.28	2.34	5.362114807	5.906819508	9.65	11.4	9.8	56	7.8	307	30.60561557	2	0	0	25	0
75	1	20.55	2	1	2	2	2	2	2	1.95	1.84	2.848076822	4.383436713	4.51	6.1	11.9	92	6.62	305	0.499	1	0	1	20	0
73	1	22.66	5	2	2	1	2	2	2	1.54	3.59	2.430643304	1.517839639	4.76	5.2	15.4	87	4.7	305	6.5	3	1	3	23	0
55	2	23.01	3	1	2	2	2	2	2	1.48	2.38	1.092698981	4.535361334	4.79	5.8	10.4	67	9.45	303	0.499	1	0	1	23	0
73	1	22.27	4	2	1	1	2	2	2	1.17	1.89	1.06712973	6.023490347	4.44	4.6	13.7	57	8.82	301	6.9	2	0	1	25	0
48	2	20.57	4	1	2	2	2	2	2	0.964342442	1.95	0.96	3.92	5.45	5.1	9.3	48	4.2	300	0.68	2	0	0	24	0
68	2	19.53	5	1	2	2	2	2	2	1.25	2.65	4.009649134	6.322384306	6	5.5	50.5	50	10	300	5	2	0	2	25	0
78	1	22.49	2	1	1	1	1	2	2	4	10	3.753532717	2.677698366	9	8.1	6	66	5	300	5	2	0	3	23	0
61	2	20.55	4	1	2	1	1	2	2	1.88019711	2.38	1.84	4.91	7.32	8.3	18.8	70	6.86	300	0.54	2	0	3	20	0
55	1	22.77	4	1	2	1	2	2	2	1.692422156	2.65	2.92757661	4.821457195	4.09	5.6	36.7	59	3.99	299	10.48060991	2	0	1	25	0
69	1	19.36	4	2	1	1	2	2	2	1.25	1.69	2.673719277	3.797217346	5.8	4.31	9.6	60	4.8	299	0.31	5	1	2	22	0
67	2	24.65	4	1	2	2	2	2	2	1.65	3.93	1.582094674	2.854084454	4.58	5.8	18.4	68	6.71	297	0.499	2	0	3	25	0
71	1	25.97	4	3	1	1	2	2	2	1.630497713	1.7	0.923437452	1.126314955	4.3	5.1	19.5	66	7.37	296	19.73202162	2	0	3	24	0
64	2	23.44	5	1	2	1	2	2	2	1.48	2.51	0.028945554	3.580064845	4.26	5.2	14.4	76	9.65	296	10.88	2	0	3	25	0
69	2	22.43	5	1	2	1	1	2	2	1.082236491	1.35	1.021339504	4.620034543	6.06	5.5	12.5	87	4.55	295	2.129175925	3	1	3	25	0
34	2	25.39	1	1	2	2	2	2	2	1.08	3.12	2.820117221	2.928350031	5.6	6.2	8.9	67	6.05	288	5.1	2	0	1	22	0
54	2	23.44	4	1	2	2	2	2	2	2.1	1.9	1.107944466	5.187833343	6.2	5.8	16	74	5.58	284	0.499	1	0	0	23	0
66	1	21.1	4	1	1	1	2	2	2	1.44	3.18	4.247231193	5.733089377	6.1	5.8	5.81	72	6.31	283	3.1	3	1	3	23	0
74	1	23.88	4	1	2	2	2	2	2	1.176265321	2.75	1.481363146	4.982541878	5.43	5.5	13.8	65	6.87	282	30.15606339	3	1	3	22	0
45	1	23.88	3	3	1	1	2	2	2	1.53	1.92	4.799816068	5.893149353	7.14	5	12	83	5.4	281	4	1	0	1	24	0
63	2	22.55	4	1	2	1	2	2	2	1.56	3.49	0.312864135	4.661557721	6.6	5.8	14	111	4.76	281	2.1	2	0	2	24	0
77	1	20.76	4	1	2	2	1	2	2	2.106307318	0.93	3.907058963	4.706036949	11.24	6.5	12	77	5.47	280	72.00962392	2	0	1	22	0
56	2	28.3	5	1	2	2	2	2	2	1.45	3.54	3.51134708	3.871375684	5.54	6.3	12.1	61	3.98	279	4.3	2	0	3	23	0
71	2	22.22	4	1	2	2	1	2	2	1.07	2.29	0.078621398	4.564955222	14.7	7.6	11.9	55	8.48	278	0.499	3	1	1	20	0
52	2	28.89	3	1	2	1	1	2	2	1.4	1.88	2.701309832	3.699686148	3.31	5.6	13.1	61	3.47	277	0.57	1	0	1	25	0
77	1	24.44	2	2	2	2	2	2	2	1.05	2.62	1.305295425	5.883069561	4.2	5.9	15.4	81	5	277	7.552829475	2	0	1	22	0
74	2	21.37	5	1	2	2	2	2	2	1.32	3.47	1.975919507	6.128718219	4.45	4.8	7.6	76	4.1	271	3.1	2	0	3	23	0
81	1	22.15	4	1	2	1	2	2	2	0.944638901	2.49	1.67	4.25	5.93	6.4	15.1	76	3.56	269	7.6	3	1	3	22	0
74	2	24.89	5	1	2	1	2	2	2	1.39	1.23	2.59393712	6.33371936	7.08	7	13.9	59	2.7	265	0.499	3	1	2	24	0
49	2	20.5	4	1	2	1	2	2	2	1.24	3.11	1.29567432	4.599858468	3.85	4.8	12.6	58	3.6	263	6.8	2	0	2	25	0
66	1	22.49	4	1	2	2	2	2	2	1.55	2.19	2.258129348	5.975819295	4.35	5.1	21.2	69	6.62	262	5	2	0	2	21	0
76	1	22.86	4	1	2	2	2	2	2	1.15	3.23	1.342899683	4.213990262	6.23	7.5	18.8	78	4.8	261	1	2	0	0	22	0
57	2	20.31	3	1	2	1	2	2	2	1.12921651	2.02	5.972585412	5.355163864	3.97	5.5	11.8	44	4.95	261	5.956609405	2	0	3	25	0
81	1	23.24	5	1	2	1	2	2	2	1.474571847	1.72	1.09305381	4.634137236	8.47	6.7	13	55	5.55	260	40.10996986	3	1	2	23	0
61	2	18.73	5	1	2	1	2	1	2	1.51	3.86	1.94899383	3.430406762	4.41	5.5	16.4	65	4.64	259	0.499	2	0	1	25	0
74	1	21.08	3	1	2	1	2	2	2	1.401674784	1.77	0.73	3.3	5.01	5.8	12	82	8	258	0.58	2	0	0	22	0
64	2	21.64	3	1	2	2	2	2	2	2.39251479	3.03	4.029348173	3.477848565	5.8	5.8	8.2	66	6.88	256	55.88164949	2	0	1	25	0
70	2	24.24	5	1	2	1	1	2	2	1.49	3.7	1.940342573	4.01774683	13.83	7.9	17	83	7.9	253	0.499	2	0	1	25	0
77	2	26.17	5	1	2	1	2	2	2	1.66	2.52	0.96405591	3.660412554	5.39	5.6	12.7	70	10.18	249	0.499	2	0	2	25	0
64	2	20.89	3	1	2	1	2	2	2	1.55	2.2	1.19582415	4.693893188	5.02	5	8.6	7.4	4.84	241	0.49	2	0	0	25	0
76	1	23.03	4	1	2	2	2	2	2	1.047923511	0.97	1.765640924	3.712459329	6.5	5.6	12.2	81	6.5	238	29.45450668	2	0	2	25	0
80	2	19.57	5	1	2	1	2	2	2	1.466739946	2.67	1.846215442	1.783364401	4.77	6.3	12.7	56	12	236	1.2	2	0	1	24	0
71	2	19.53	4	1	2	1	1	2	2	1.496740029	1.26	0.77	2.74	5.75	8.3	9.3	64	3.98	231	5	2	0	3	25	0
74	1	20.52	4	2	1	1	2	2	2	0.99	2.74	2.592484703	5.592868576	5.32	5.9	15.9	57	4.7	227	1.55	1	0	1	24	0
76	1	21.83	4	2	2	1	2	2	2	1.14	2	1.286999529	2.567893132	4.65	5.5	7.3	89	3.92	227	5.9	2	0	3	25	0
64	1	19.84	4	3	2	1	2	2	2	1.37	2.5	0.285169395	4.329947495	5.6	5.4	11.8	69	5.01	217	0.67	5	1	2	22	0
64	1	21.05	4	1	2	2	1	2	2	1.51	2.68	3.091225054	4.165508433	18.87	9	9.7	48	3.61	200	10	2	0	2	22	0
52	2	20.2	3	3	2	1	1	2	2	1.6	2.01	3.728906865	5.775800595	8.43	8.9	11.2	70	9.55	191	3.05	2	0	1	22	0
71	2	19.61	3	1	2	1	2	2	2	2.012540418	1.4	0.403821153	4.722660427	5.94	7.83	10	56	4.72	109	6.159131623	3	1	2	25	0
